## 19 Introduction

20 Establishing spatial correspondence between images is a crucial step in neuroimaging studies enabling  
21 fusion of multimodal information, analysis of focal morphological differences, and comparison of within-  
22 and between-study data in a common coordinate space. Stereotaxy arose as a result of questions raised  
23 by scientists and surgeons interested in the physiology and treatment of focal brain structures (A. C.  
24 Evans, Janke, Collins, & Baillet, 2012; Horsley & Clarke, 1908; Peters, 2006). Jean Talairach played a  
25 crucial role, observing consistent anatomical features on lateral pneumoencephalograms (Dandy, 1918),  
26 or "air studies", that could be consistently localized, specifically the anterior commissure (AC) and  
27 posterior commissure (PC) (Schaltenbrand & Wahren, 1977; J Talairach, David, Tournoux, Corredor, &  
28 Kvasina, 1957), and could thus be mapped to prepared post-mortem brain sections in a 3D coordinate  
29 system. The AC-PC line has remained important in the era since magnetic resonance imaging (MRI) has  
30 risen to prominence for aligning brain images to create population atlases (Collins, Neelin, Peters, &  
31 Evans, 1994; A. Evans et al., 1992; Jean Talairach & Tournoux, 1988) as well as to project data from  
32 structural and functional investigations. Further optimizations enabled by deformable registration have  
33 led to atlas enhancements (Fonov et al., 2011) where many more structural features are preserved. The  
34 adoption of standard templates has allowed researchers to compile cytoarchitectonic, functional, and  
35 structural data across studies via image-based meta-analysis of peak coordinates and statistical maps  
36 (Eickhoff et al., 2009; Gorgolewski et al., 2015; Yarkoni, Poldrack, Nichols, Van Essen, & Wager, 2011).

37  
38 Ever since the first linearly aligned population templates (A. Evans et al., 1992; Jean Talairach &  
39 Tournoux, 1988), there have been a number of advances in the development of robust higher order  
40 nonlinear registration tools. As the options became more numerous, several studies investigated the  
41 performance of the different nonlinear registration algorithms (Chakravarty et al., 2009; A. C. Evans et  
42 al., 2012; Hellier et al., 2003; Klein et al., 2009). Over the past decade, the most common metrics used to  
43 evaluate spatial correspondence are related to voxel overlap between regions-of-interest (ROIs)  
44 segmented in both reference and target images. Typically, large subcortical structures well-visualized on

45 standard structural MRIs such as the globus pallidus (pallidum), striatum, and thalamus are used  
46 (Chakravarty et al., 2009; Chakravarty, Sadikot, Germann, Bertrand, & Collins, 2008; Klein et al., 2009).  
47 While these measures are effective for evaluating spatial correspondence on the macroscale, here we  
48 argue that they remain relatively coarse measures of registration quality and are insensitive to focal  
49 misregistration between images. In addition, they do not permit facile identification or description of  
50 where these local biases are occurring. These issues are particularly critical as technical advancements  
51 in both imaging and stereotaxy are enabling more accurate therapeutic modulation of brain regions  
52 where several millimeters could represent the difference between optimal therapy and complications.

53

54 In this paper, we sought inspiration from classical stereotactic methods (Schaltenbrand & Wahren, 1977;  
55 J Talairach et al., 1957), and propose that point-based distances provide a more sensitive metric by  
56 which brain image correspondence can be evaluated. Anatomical points have been referred to in the  
57 literature using a variety of terms including fiducials, landmarks, markups (sometimes used in  
58 combination) but ultimately involve representing an anatomical feature by a three-dimensional (x,y,z)  
59 Cartesian coordinate. For this manuscript, we have chosen to use the term *AFIDs*, short for *anatomical*  
60 *fiducials*, "fiducia" being Latin for *trust* or *confidence*. We argue that the advent of automatic  
61 segmentation-based methods has led to a relative underemphasis of point correspondence between  
62 brain structures. We first sought to determine whether we could define a set of AFIDs that were both  
63 consistently identifiable across multiple datasets while also providing a distributed sampling about the  
64 brain. Following this, we demonstrate how AFIDs are complementary to segmentation-based metrics for  
65 providing a quantitative report of spatial correspondence between structural magnetic resonance images  
66 of the brain using more intuitive distance-based measures of alignment. Central to this work was the  
67 development of our protocol using an open source framework, enabling reproducibility across sites and  
68 centers. The overall study organization is shown schematically in Fig 1.

69

## Evaluating correspondence between brain images

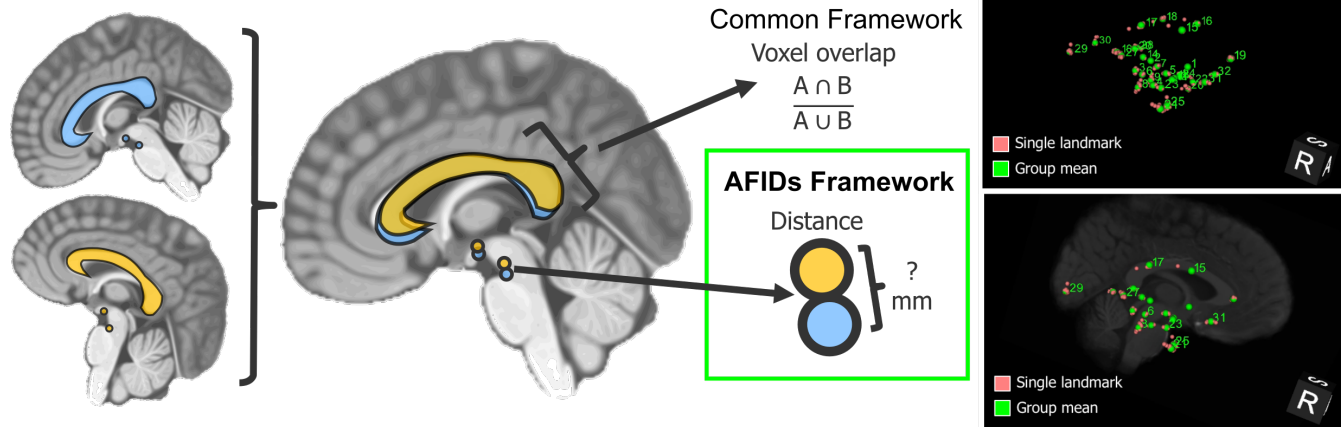

70

71 **Fig 1.** Metrics for evaluating spatial correspondence between brain images include voxel overlap (i.e. ROI-based) metrics as  
72 well as point-based distance metrics. The proposed framework involves the identification of point-based anatomical fiducials  
73 (AFIDs) in a series of brain images, which provide an intuitive millimetric estimate of correspondence error between images and  
74 is also a useful tool for teaching neuroanatomy.

## 75 Methods

### 76 Protocol development

77 A series of anatomical fiducials (AFIDs) were identified by the lead author (JCL; 10 years experience in  
78 neuroanatomy) in consultation with an experienced neurosurgeon (AGP; 20+ years experience practicing  
79 stereotactic and functional neurosurgery) with consensus achieved on a set of 32 points; which we refer  
80 to as AFID32 (see Fig 2; RRID:SCR\_016623). AFIDs could generally be classified as midline (10/32 =  
81 31.25%) or lateral (22/32; i.e. 11 structures that could be placed on each of the left and right sides).  
82 Regions prone to geometric distortion were avoided (Lau et al., 2018). We limited our initial set of AFID  
83 locations to deep brain regions where less inter-subject variability exists (millimeter scale) compared to  
84 the cortical sulci and gyri (centimeter scale) (Thompson, Schwartz, Lin, Khan, & Toga, 1996).

85

86 The AFID points were placed using the Markups Module of 3D Slicer version 4.6.2 (Fedorov et al., 2012)  
87 (RRID:SCR\_005619). One key feature of 3D Slicer is that it allows markup points to be placed in the 3D  
88 coordinate system of the software as opposed to the voxel coordinate system of the image being  
89 annotated permitting more refined (sub-voxel) localization. Images are automatically linearly interpolated

90 by the software on zoom. After importing the structural MRI scan to be annotated into 3D Slicer, the  
91 anterior commissure (AC) and posterior commissure (PC) points were placed—specifically the center of  
92 each commissure rather than the intraventricular edge. After defining an additional midline point (typically  
93 the pontomesencephalic junction or intermamillary sulcus), an AC-PC transformation was performed  
94 using the built-in Slicer module (AC-PC Transform). For all subsequent AFID placements, the AC-PC  
95 aligned image was used. The AFID32 protocol is shown in MNI2009bAsym space in Fig 2.

96

97 The rest of the methods are organized into four separate phases. Phase 1 involved AFID32 placement in  
98 three open access brain templates. Phase 2 involved further placement of the AFIDs in individual subject  
99 scans. In Phase 3, AFIDs were used to evaluate subject-to-template registration; and finally, in Phase 4,  
100 they were used to assess template-to-template registration quality.

101

102 For validation and assessment, we adopted the terminology of Fitzpatrick and colleagues (Fitzpatrick &  
103 West, 2001; Fitzpatrick, West, & Maurer, 1998) who defined fiducial localization error (FLE) and fiducial  
104 registration error (FRE) as metrics used to evaluate the real-world accuracy of image-guidance systems  
105 used in neurosurgery. FLE is defined as error related to the placement (i.e. localization) of fiducials, while  
106 FRE is defined as error related to registration. This body of work has been most concerned with  
107 describing the correspondence between preoperative images of a patient and the physical location of the  
108 patient and surgical site in the operating room. Here, we use these terms to describe (virtual, image-  
109 based) *anatomical* fiducials (AFIDs) annotated in structural T1-weighted MRI scans.



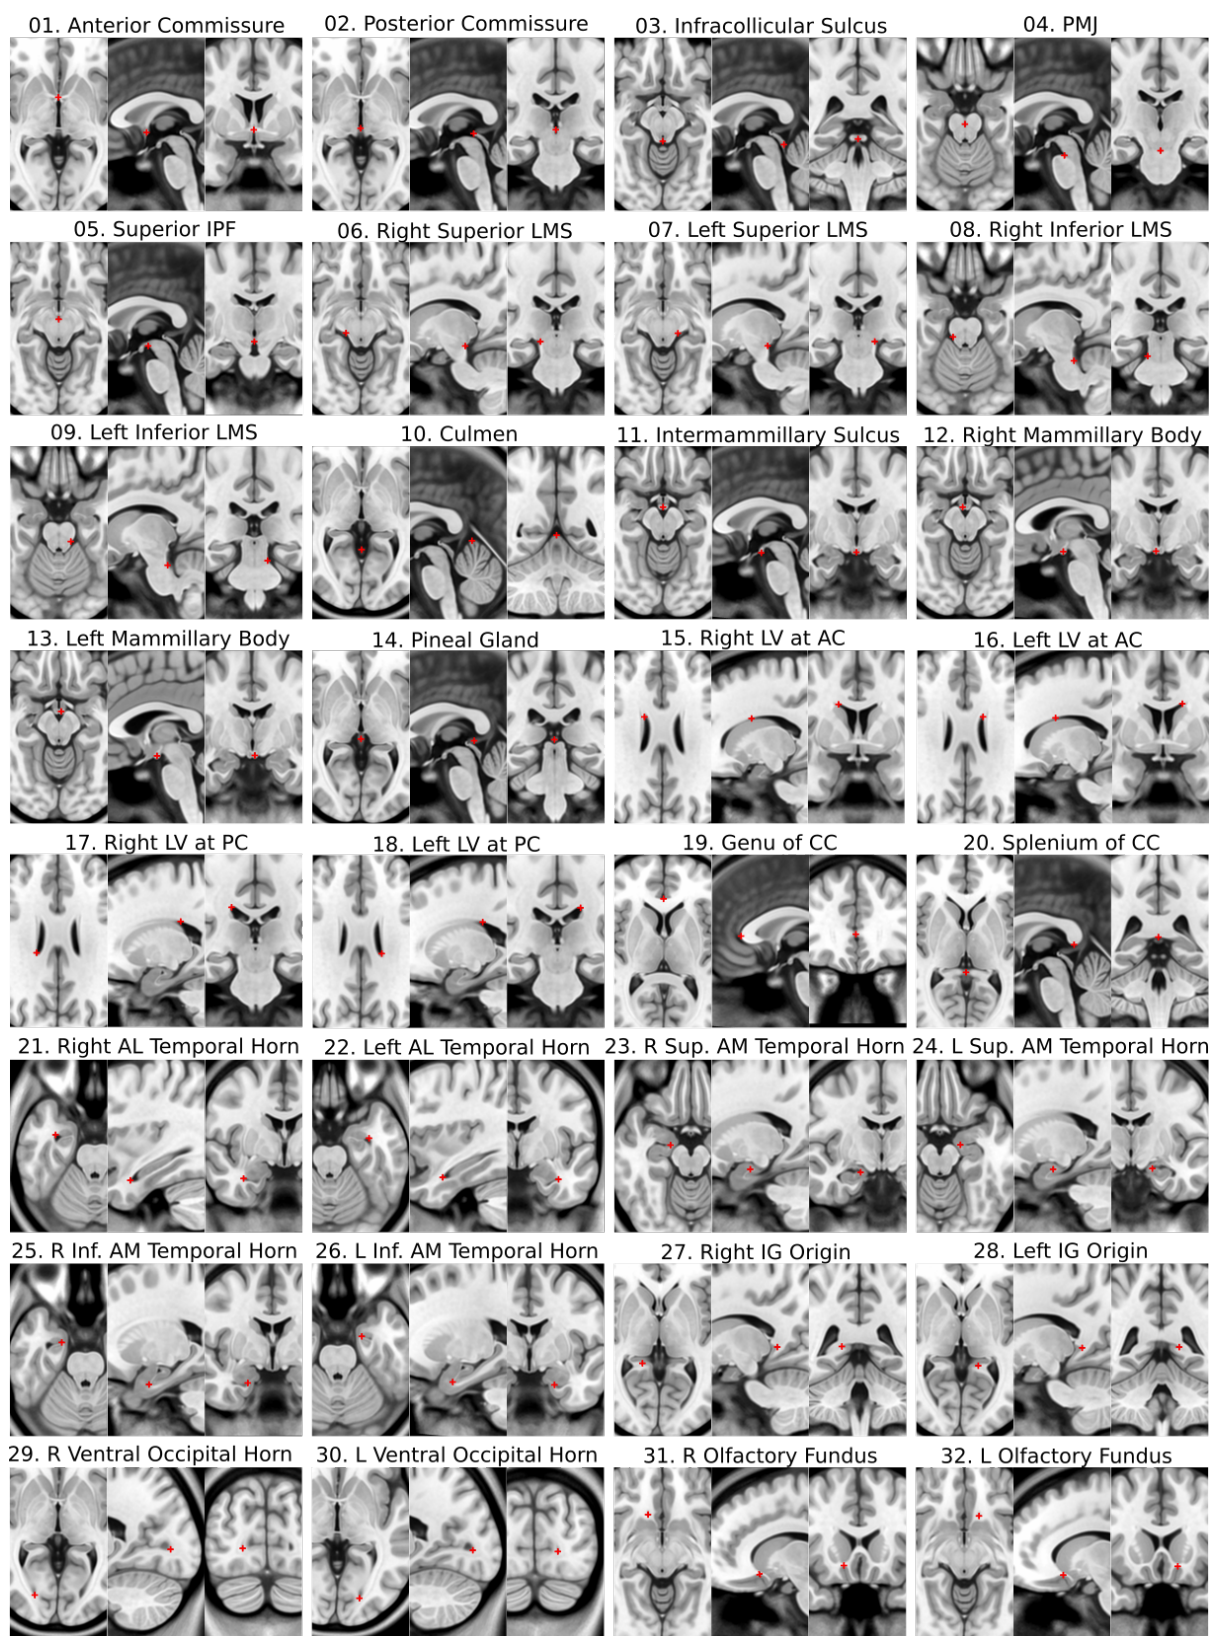

110

111 **Fig 2.** Each anatomical fiducial in the full AFID32 protocol is demonstrated with crosshairs at the representative location in  
 112 MNI2009bAsym space using the standard cardinal planes after an AC-PC transformation. AC = anterior commissure; PC =  
 113 posterior commissure; AL = anterolateral; AM = anteromedial; IG = indusium griseum; IPF = interpeduncular fossa; LMS =  
 114 lateral mesencephalic sulcus; LV = lateral ventricle; PMJ = pontomesencephalic junction.

## 115 Phase 1: Protocol validation for brain templates

116 Novice participants (N=8) were trained over a series of neuroanatomy tutorials to place AFIDs on a  
117 number of publicly available brain images: Agile12v2016 (Lau et al., 2017; Wang et al., 2016), Colin27  
118 (Holmes et al., 1998), MNI2009bAsym (nonlinear asymmetric; version 2009b; RRID:SCR\_008796)  
119 (Fonov et al., 2011). Each participant then performed 4 rating sessions independently for each template,  
120 for a total of 12 point sets resulting in a total of 96 AFID32 protocols. We computed several different  
121 metrics for describing the accuracy (and reliability) of our proposed protocol, all of which are variations of  
122 *anatomical fiducial localization error (AFLE)*: *mean AFLE*, *intra-rater AFLE*, and *inter-rater AFLE* as  
123 shown in Fig 3.

124

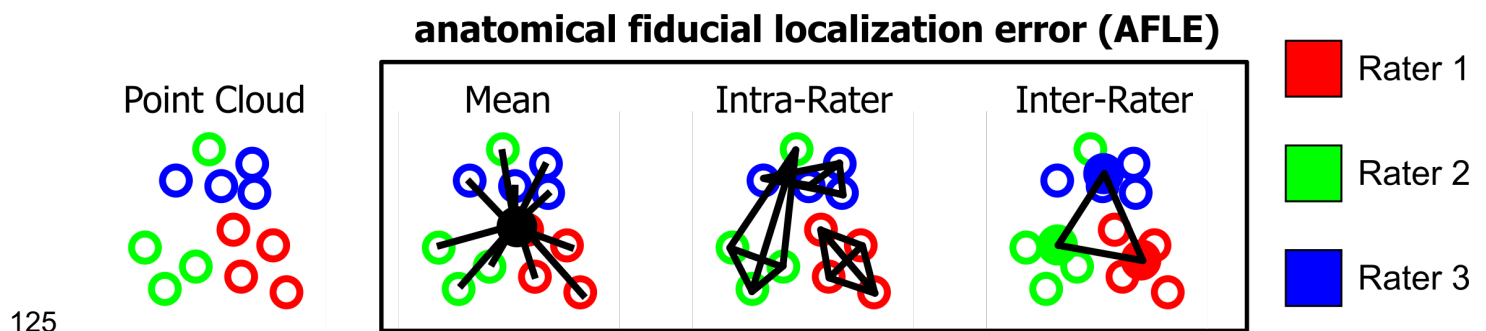

126 **Fig 3.** Metrics used for validating AFID placements are shown here in schematic form. Mean, intra-rater, and inter-rater AFLE  
127 can be computed for an image that has been rated by multiple raters multiple times.  
128

129 To compute the *mean AFLE*, the mean AFID coordinate for each brain image was used as an  
130 approximation of the ideal coordinate location. Mean AFLE was calculated as the Euclidean distance  
131 between the individual position and the group mean. We furthermore calculated *intra-rater AFLE* as the  
132 mean pairwise distance between AFIDs placed by the same rater. The individual measures were  
133 averaged across all raters as a summary metric. To calculate *inter-rater AFLE*, a mean coordinate was  
134 computed by averaging the coordinates for each rater as an estimate of the ideal coordinate location for  
135 the rater; the mean pairwise distance between AFIDs placed across raters was then calculated as a  
136 summary metric. We summarized global and location-specific mean AFLE according to a number of  
137 variables: template (group versus individual), rating session (1-4), rater, and AFID.

138

139 Time required to complete AFID32 placement for a single MRI was documented by each rater. Outliers  
140 were defined as any fiducials deviating from the mean fiducial point by greater than 10 mm. Furthermore,  
141 patterns of variability in AFID placement were assessed using K-means clustering of fiducial locations  
142 (point clouds) relative to the mean fiducial location.

## 143 Phase 2: Protocol validation for individual subjects

144 The same participants and the lead author (total N=9) performed additional AFID placement on a series  
145 of 30 independent brain images from the OASIS-1 database (Marcus, Fotenos, Csernansky, Morris, &  
146 Buckner, 2010) (RRID:SCR\_007385). Subjects from the OASIS-1 database were selected from the  
147 broad range of ages encountered in the database, restricted to cognitively intact (MMSE 30) participants.  
148 Although we controlled for normal cognition by MMSE, we selected for qualitatively challenging images  
149 with more complex anatomy (asymmetric anatomy and/or variably-sized ventricles). Details on the 30  
150 scans are provided in the S2 file and organized into the Brain Imaging Data Structure (BIDS) format  
151 (Gorgolewski, Auer, Calhoun, Craddock, & Das, 2016) (RRID:SCR\_016124) .

152

153 Each of the 9 participants placed 10 independent AFID32 protocols for a total of 90 AFID32 protocols  
154 and 2880 individual points. Each of the 30 MRI scans from the OASIS-1 database had AFIDs placed by  
155 3 raters to establish *inter-rater AFLE* (as described in Methods Section Phase 1: Protocol Validation for  
156 Brain Templates). Intra-rater AFLE was not evaluated in Phase 2. Quality of rigid registration was visually  
157 inspected by an experienced rater (JL).

## 158 Region-of-interest segmentation

159 BIDS formatting permitted automatic processing of each of the included OASIS-1 subjects using  
160 fMRIPrep version 1.1.1 (Esteban et al., 2018; Gorgolewski et al., 2017) (RRID:SCR\_016216) with  
161 anatomical image processing only. Briefly, the fMRIPrep pipeline involves linear and deformable  
162 registration to the MNI2009cAsym template (Avants, Epstein, Grossman, & Gee, 2008; Fonov et al.,  
163 2011) then processing of the structural MRI through Freesurfer for cortical surface and subcortical



164 volumetric labeling (Dale, Fischl, & Sereno, 1999; Bruce Fischl, 2012) (RRID:SCR\_001847). We focused  
165 on using ROIs commonly used in the literature to evaluate quality of registration in the subcortex  
166 (Chakravarty et al., 2009; Hellier et al., 2003; Klein et al., 2009), i.e. the pallidum, striatum, and thalamus  
167 provided as part of the fMRIPrep output run through FreeSurfer. The striatum label required combining  
168 the ipsilateral caudate nucleus, accumbens, and putamen labels.

### 169 Phase 3: Evaluating subject-to-template registration

170 We evaluated the quality of subject-to-template registration using the output provided as part of  
171 fMRIPrep version 1.1.1 using conventional ROI-based metrics (i.e. voxel overlap) as well as distance  
172 metrics derived from our manual AFID32 annotations from Phases 1 and 2. The default template for  
173 fMRIPrep 1.1.1 was the MNI2009cAsym template. We started by visually inspecting the images  
174 qualitatively from the output fMRIPrep html pages. For each individual subject scan, we used the mean  
175 fiducial location as the optimal location calculated in Phase 2. The distance between the individual  
176 subject AFID location and the corresponding mean AFID location in the template was computed and  
177 defined as the *anatomical fiducial registration error* (AFRE) and computed for linear transformation alone  
178 (lin) and combined linear and nonlinear transformation (nlin). Our definition of AFRE differs from the FRE  
179 used by Fitzpatrick whose framework for neuronavigation was necessarily limited to rigid-body  
180 transformations (Fitzpatrick et al., 1998). This was compared with ROI-based measures of spatial  
181 correspondence, specifically, the Jaccard similarity coefficient ( $\frac{A \cap B}{A \cup B}$ ) and the Dice kappa coefficient  
182 ( $\frac{2 \times A \cap B}{A + B}$ ), where A and B are the number of voxels in the source and reference images, respectively.

183

184 We were able to use the AFID32 points placed in Phase 1 for the MNI2009bAsym template since the  
185 only difference between the MNI2009bAsym and MNI2009cAsym templates was the resampling from 0.5  
186 mm to 1 mm isotropic resolution. AFRE was computed for each AFID location and OASIS-1 subject,  
187 along with voxel overlap for the pallidum, striatum, and thalamus. Comparisons between AFRE and voxel  
188 overlap were made using Kendall's tau.

## 189 Phase 4: Evaluating template-to-template registration

190 BigBrain is a publicly available ultrahigh-resolution (20 micron) human brain model that has enabled  
191 bridging of macroscale anatomy with near cellular anatomy (Amunts et al., 2013) (RRID:SCR\_001593).  
192 A deformable mapping provided by the MNI group has permitted the exploration of high-resolution  
193 BigBrain neuroanatomy in MNI2009bSym space (BigBrainRelease.2015; Last modified August 21, 2016;  
194 accessed August 2, 2018; Available at: [ftp://bigbrain.loris.ca/BigBrainRelease.2015/3D\\_Volumes/MNI-  
196 ICBM152\\_Space/](ftp://bigbrain.loris.ca/BigBrainRelease.2015/3D_Volumes/MNI-<br/>195 ICBM152_Space/)). In this manuscript, we refer to the registered BigBrain image as BigBrainSym. We  
197 quantify the spatial correspondence between BigBrainSym and MNI2009bSym as well as BigBrainSym  
198 and MNI2009bAsym templates using the AFID32 protocol to determine whether any significant AFRE  
199 could be identified. For MNI2009bAsym, we used mean coordinates for each AFID using rater data from  
200 Phase 1. BigBrainSym and MNI2009bSym templates were annotated *de novo* by three experienced  
201 raters (GG, JL, KF). The mean AFID coordinate was used as an approximation of the ideal coordinate  
202 location for each template. Spatial correspondence was estimated as the AFRE (i.e. Euclidean distance  
203 between points) for each AFID. Correlation between AFLE and AFRE were assessed using Kendall's  
tau.

## 204 Source code and data availability

205 All data analysis was performed using R-project version 3.5.1. The AFIDs protocol, raw and processed  
206 data, processing scripts, and scripts used in this manuscript are available at: <https://github.com/afids>.

## 207 Results

### 208 Phase 1: Protocol validation for brain templates

209 The 8 raters had a mean experience of 11.5 +/- 11.2 months in medical imaging (range: 0-24 months),  
210 14.3 +/- 17.0 months in neuroanatomy (range: 0-48 months), and 7.0 +/- 8.8 months in 3D Slicer (range:

211 0-24 months). During the template validation phase, the raters placed a total of 3072 individual points  
212 (number of sessions = 4; templates = 3; points = 32). Average AFID32 placement time was estimated at  
213 between 20-40 minutes. Thus, a total of 1920-3840 minutes (or 32-64 hours) were logged in this phase  
214 of the study. The mean, intra-rater, and inter-rater AFLE metrics are summarized in Table 1.

215

216 For the raw data, the mean AFLE was 1.27 +/- 1.98 mm (1.10 +/- 1.59 mm for Agile12v2016; 1.71 +/-  
217 2.78 mm for Colin27; 0.99 +/- 1.11 mm for MNI2009bAsym). Using a threshold of mean AFLE greater  
218 than 10 mm from the group mean, we identified 24 outliers out of 3072 independent points (0.78%).  
219 20/24 (83.33%) of outliers were the result of variable placement in the bilateral ventral occipital horns (i.e.  
220 AFID29 and AFID30) of the Colin27 template. One pair (2/24; 8.33%) of outliers was due to left-right  
221 mislabeling (indusium griseum; AFID27 and AFID28). One additional point was mislabeled; i.e. the left  
222 anterolateral temporal horn point (AFID22) was placed at the left inferior AM horn location (AFID26).  
223 After quality control and filtering outliers, mean AFLE improved to 1.03 +/- 0.94 mm (1.01 +/- 0.93 mm for  
224 Agile12v2016; 1.11 +/- 1.05 mm for Colin27; 0.97 +/- 0.80 mm for MNI2009bAsym).

225

226 **Table 1.** Summary of fiducial localization error across brain templates.

| Template            | Before QC            |                        | After QC             |                       |                       |                       |
|---------------------|----------------------|------------------------|----------------------|-----------------------|-----------------------|-----------------------|
|                     | mean AFLE (mm)       | # of outliers (%)      | mean AFLE (mm)       | # of outliers (%)     | intra-rater AFLE (mm) | inter-rater AFLE (mm) |
| <b>Agile12v2016</b> | 1.10 +/- 1.59        | 3/1024 (0.29%)         | 1.01 +/- 0.93        | 0/1021 (0.00%)        | 1.13 +/- 0.86         | 1.14 +/- 0.48         |
| <b>Colin27</b>      | 1.71 +/- 2.78        | 20/1024 (1.95%)        | 1.11 +/- 1.05        | 1/1004 (0.10%)        | 1.14 +/- 0.92         | 1.36 +/- 0.88         |
| <b>MNI2009bAsym</b> | 0.99 +/- 1.11        | 1/1024 (0.10%)         | 0.97 +/- 0.80        | 0/1023 (0.00%)        | 1.03 +/- 0.78         | 1.07 +/- 0.46         |
| <b>Total</b>        | <b>1.27 +/- 1.98</b> | <b>24/3072 (0.78%)</b> | <b>1.03 +/- 0.94</b> | <b>1/3048 (0.03%)</b> | <b>1.10 +/- 0.86</b>  | <b>1.19 +/- 0.64</b>  |

227

228 Intra-rater AFLE was 1.10 +/- 0.86 mm (1.13 +/- 0.86 mm for Agile12v2016; 1.14 +/- 0.92 mm for  
 229 Colin27; 1.03 +/- 0.78 mm); and inter-rater AFLE was 1.19 +/- 0.65 mm (1.15 +/- 0.49 mm for  
 230 Agile12v2016; 1.36 +/- 0.88 mm for Colin27; 1.07 +/- 0.46 mm for MNI2009bAsym). Mean, intra-rater,  
 231 and inter-rater AFLE for each AFID post-QC are summarized in the Supporting Information S1 File.

232

233 All subsequent analyses were performed using the mean AFLE metric. We performed a one-way  
 234 analysis of variance observing evidence of statistically different variance between templates (F-value =  
 235 7.88; p-value < 0.001). Differences in mean AFLE between templates were identified on subgroup  
 236 analysis for the right superior lateral mesencephalic sulcus (AFID06), culmen (AFID10), genu of the  
 237 corpus callosum (AFID19), and left superior anteromedial temporal horn (AFID24), suggesting  
 238 differences between templates that may contributing to errors in placement. The results for each AFID  
 239 are also summarized in the Supporting Information S1 File.

240

241 Furthermore, we observed several distinct patterns of AFID placement using K-means clustering of  
 242 fiducial locations (point clouds) relative to the mean fiducial location (see Fig 4). We identified three  
 243 different general patterns of point cloud distributions ranging from highly anisotropic to moderately  
 244 anisotropic to isotropic.

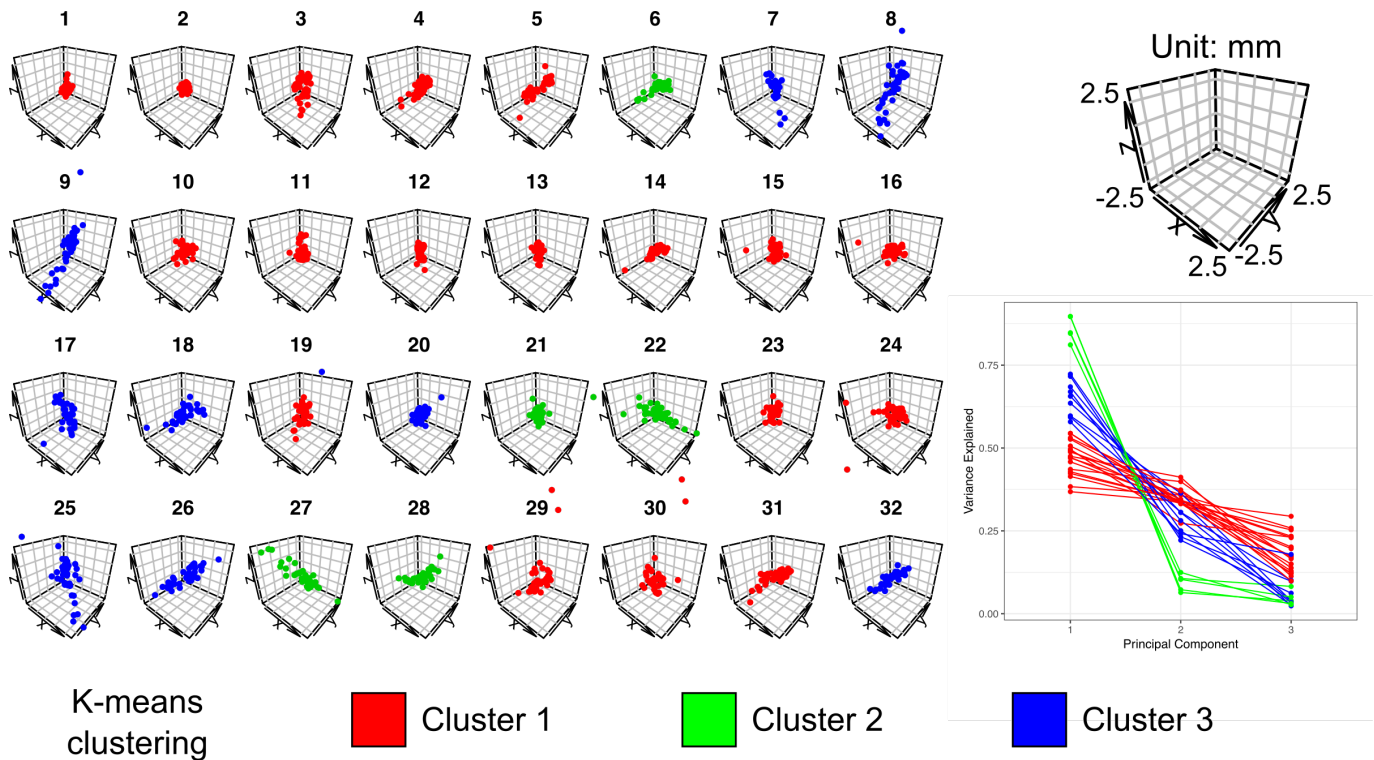

245

246  
247  
248  
249  
250  
251

**Fig 4.** K-means clustering of point clouds relative to the mean fiducial location for each of the 32 AFIDs (left). Principle components analysis (bottom right) revealed three different general patterns were identified ranging from highly isotropic (Cluster 1: red) to moderately anisotropic (Cluster 2: blue) to anisotropic (Cluster 3: green). Results are shown for the MNI2009bAsym template. See the Supplementary Materials for similar plots for Agile12v2016, Colin27, and the templates combined.

252  
253  
254  
255  
256  
257  
258  
259  
260

As a secondary analysis, we explored whether any evidence of learning over the 4 independent rating sessions could be identified (Supporting Information S1 file). Using linear modeling, we identified a general decrease in mean AFLE with increasing session number although this did not meet thresholds of statistical significance (estimate = -0.02 mm/session; p-value = 0.11). These trends were explored on the individual rater level. For two out of 8 raters, AFLE varied with session number. Rater04 demonstrated a general linear improvement of -0.17 mm/session from an initial mean AFLE of 1.64 mm (i.e. the worst performing initial session); however Rater02 worsened at a rate of 0.12 mm/session from an initial mean AFLE of 0.59 mm (i.e. the best performing initial session). No significant effect with individual AFIDs was identified. All subgroup analyses were multiple comparisons corrected using FDR (q-value < 0.05).



## 261 Phase 2: Protocol validation for individual subjects

262 During the individual subject validation phase, 9 participants completed 10 AFID protocols (= 90 total  
263 protocols) and a total of 2880 individual points distributed equally among 30 OASIS-1 datasets. We  
264 identified 28 outliers (0.97%), defined as individual point placements greater than 1 cm (10 mm) away  
265 from the group mean. 8/28 outliers (28.57%) were the result of mislabeled points: three pairs of lateral  
266 (non-midline) AFIDs and only one pair due to gross mislabeling of the target AFID structure (placement  
267 in bilateral frontal ventricular horns rather than occipital horns). Beyond left-right swapping, the AFIDs  
268 most susceptible to outliers were the following points: bilateral ventral occipital horns (AFID29-30) and  
269 bilateral indusium griseum origins (AFID27-28). Mean AFLE across the 30 scans and points was 1.28 +/-  
270 3.03 mm improving to 0.94 +/- 0.73 after filtering out the outliers. Inter-rater AFLE was 1.58 +/- 1.02 mm  
271 across all AFIDs. Mean AFLE and inter-rater AFLE are summarized for each AFID in Table 2 and subject  
272 in the Supporting Information S2 file.

## 273 fMRIPrep results

274 fMRIPrep ran successfully on 29/30 datasets (96.7%). For the failed dataset, the participant was more  
275 hyperextended in the scanner than is typical relative to the long axis of the scanner. This was resolved  
276 by first performing a rigid body registration to MNI305 space and providing the transformed image as  
277 input to fMRIPrep.

278

279

**Table 2.** Mean and inter-rater fiducial localization error pre- and post-QC for the included OASIS-1 subjects for all AFIDs.

| AFID | Description                    | Pre-QC                           | Post-QC                          |                                         |
|------|--------------------------------|----------------------------------|----------------------------------|-----------------------------------------|
|      |                                | Mean AFLE<br>mean $\pm$ sd (max) | Mean AFLE<br>mean $\pm$ sd (max) | Inter-Rater AFLE<br>mean $\pm$ sd (max) |
| 01   | AC                             | 0.36 $\pm$ 0.21 (1.29)           | 0.36 $\pm$ 0.21 (1.29)           | 0.60 $\pm$ 0.25 (1.38)                  |
| 02   | PC                             | 0.34 $\pm$ 0.16 (0.88)           | 0.34 $\pm$ 0.16 (0.88)           | 0.57 $\pm$ 0.21 (1.22)                  |
| 03   | infracollicular sulcus         | 0.78 $\pm$ 0.48 (3.07)           | 0.78 $\pm$ 0.48 (3.07)           | 1.34 $\pm$ 0.64 (3.84)                  |
| 04   | PMJ                            | 0.83 $\pm$ 0.49 (2.44)           | 0.83 $\pm$ 0.49 (2.44)           | 1.41 $\pm$ 0.55 (2.55)                  |
| 05   | superior interpeduncular fossa | 1.20 $\pm$ 0.75 (3.50)           | 1.20 $\pm$ 0.75 (3.50)           | 2.04 $\pm$ 0.90 (4.25)                  |
| 06   | R superior LMS                 | 1.30 $\pm$ 1.74 (14.25)          | 1.01 $\pm$ 0.55 (2.85)           | 1.70 $\pm$ 0.68 (3.13)                  |
| 07   | L superior LMS                 | 1.36 $\pm$ 1.71 (13.99)          | 1.06 $\pm$ 0.61 (3.45)           | 1.72 $\pm$ 0.71 (3.89)                  |
| 08   | R inferior LMS                 | 1.13 $\pm$ 0.75 (5.13)           | 1.03 $\pm$ 0.57 (2.99)           | 1.77 $\pm$ 0.74 (3.43)                  |
| 09   | L inferior LMS                 | 1.10 $\pm$ 0.80 (5.31)           | 1.01 $\pm$ 0.62 (2.72)           | 1.71 $\pm$ 0.86 (3.71)                  |
| 10   | culmen                         | 0.99 $\pm$ 0.99 (5.66)           | 0.83 $\pm$ 0.62 (3.07)           | 1.35 $\pm$ 0.82 (3.42)                  |
| 11   | intermammillary sulcus         | 0.60 $\pm$ 0.31 (1.62)           | 0.60 $\pm$ 0.31 (1.62)           | 1.02 $\pm$ 0.41 (1.86)                  |
| 12   | R MB                           | 0.40 $\pm$ 0.23 (1.11)           | 0.40 $\pm$ 0.23 (1.11)           | 0.69 $\pm$ 0.32 (1.52)                  |
| 13   | L MB                           | 0.36 $\pm$ 0.20 (1.20)           | 0.36 $\pm$ 0.20 (1.20)           | 0.62 $\pm$ 0.29 (1.62)                  |
| 14   | pineal gland                   | 0.68 $\pm$ 0.47 (1.98)           | 0.68 $\pm$ 0.47 (1.98)           | 1.16 $\pm$ 0.69 (2.63)                  |
| 15   | R LV at AC                     | 1.00 $\pm$ 0.90 (5.28)           | 0.91 $\pm$ 0.72 (4.45)           | 1.55 $\pm$ 1.08 (5.86)                  |
| 16   | L LV at AC                     | 1.01 $\pm$ 0.80 (4.53)           | 0.94 $\pm$ 0.70 (4.53)           | 1.60 $\pm$ 1.08 (5.47)                  |
| 17   | R LV at PC                     | 0.92 $\pm$ 0.54 (3.42)           | 0.92 $\pm$ 0.54 (3.42)           | 1.54 $\pm$ 0.77 (3.84)                  |
| 18   | L LV at PC                     | 0.87 $\pm$ 0.42 (2.20)           | 0.87 $\pm$ 0.42 (2.20)           | 1.46 $\pm$ 0.55 (2.80)                  |
| 19   | genu of CC                     | 0.97 $\pm$ 0.81 (5.16)           | 0.89 $\pm$ 0.63 (3.69)           | 1.50 $\pm$ 0.89 (4.30)                  |
| 20   | splenium                       | 0.54 $\pm$ 0.25 (1.24)           | 0.54 $\pm$ 0.25 (1.24)           | 0.91 $\pm$ 0.35 (1.66)                  |
| 21   | R AL temporal horn             | 1.44 $\pm$ 1.09 (7.01)           | 1.30 $\pm$ 0.86 (4.45)           | 2.21 $\pm$ 1.13 (5.92)                  |
| 22   | L AL temporal horn             | 1.22 $\pm$ 0.77 (4.11)           | 1.22 $\pm$ 0.77 (4.11)           | 2.04 $\pm$ 1.01 (4.47)                  |
| 23   | R superior AM temporal horn    | 1.28 $\pm$ 1.27 (8.22)           | 1.12 $\pm$ 0.88 (4.69)           | 1.86 $\pm$ 1.19 (4.97)                  |
| 24   | L superior AM temporal horn    | 1.09 $\pm$ 1.22 (7.54)           | 0.83 $\pm$ 0.61 (3.66)           | 1.39 $\pm$ 0.85 (4.60)                  |
| 25   | R inferior AM temporal horn    | 1.69 $\pm$ 1.43 (9.03)           | 1.44 $\pm$ 0.91 (4.72)           | 2.39 $\pm$ 1.23 (5.07)                  |
| 26   | L inferior AM temporal horn    | 1.99 $\pm$ 1.75 (8.79)           | 1.49 $\pm$ 1.09 (4.70)           | 2.42 $\pm$ 1.47 (6.64)                  |
| 27   | R indusium griseum origin      | 3.13 $\pm$ 4.19 (23.44)          | 1.77 $\pm$ 0.99 (4.77)           | 2.95 $\pm$ 1.20 (5.75)                  |
| 28   | L indusium griseum origin      | 2.99 $\pm$ 4.30 (24.30)          | 1.68 $\pm$ 1.00 (5.00)           | 2.75 $\pm$ 1.29 (5.78)                  |
| 29   | R ventral occipital horn       | 3.64 $\pm$ 10.36 (78.74)         | 0.69 $\pm$ 0.39 (2.11)           | 1.14 $\pm$ 0.54 (2.53)                  |
| 30   | L ventral occipital horn       | 3.43 $\pm$ 10.38 (80.42)         | 0.86 $\pm$ 0.67 (4.94)           | 1.39 $\pm$ 0.98 (5.72)                  |
| 31   | R olfactory sulcal fundus      | 0.99 $\pm$ 0.53 (2.29)           | 0.99 $\pm$ 0.53 (2.29)           | 1.71 $\pm$ 0.60 (2.84)                  |
| 32   | L olfactory sulcal fundus      | 1.21 $\pm$ 0.74 (4.53)           | 1.21 $\pm$ 0.74 (4.53)           | 2.11 $\pm$ 0.92 (5.81)                  |

## 282 Phase 3: Evaluating subject-to-template registration

283 The following section uses the AFIDs to evaluate the quality of spatial correspondence between the  
284 Phase 2 subject data with the MNI2009cAsym template as processed through fMRIPrep. Visual  
285 inspection of the fMRIPrep generated reports revealed no gross misregistrations between MNI2009c and  
286 the individual subject scans although a pattern of worse deformable registration in subjects with enlarged  
287 ventricles was observed. The rest of this section is concerned with examining the comparative utility of  
288 conventional voxel overlap (ROI-based) metrics against the point-based (AFRE) metric proposed in this  
289 study (see Fig 5A).

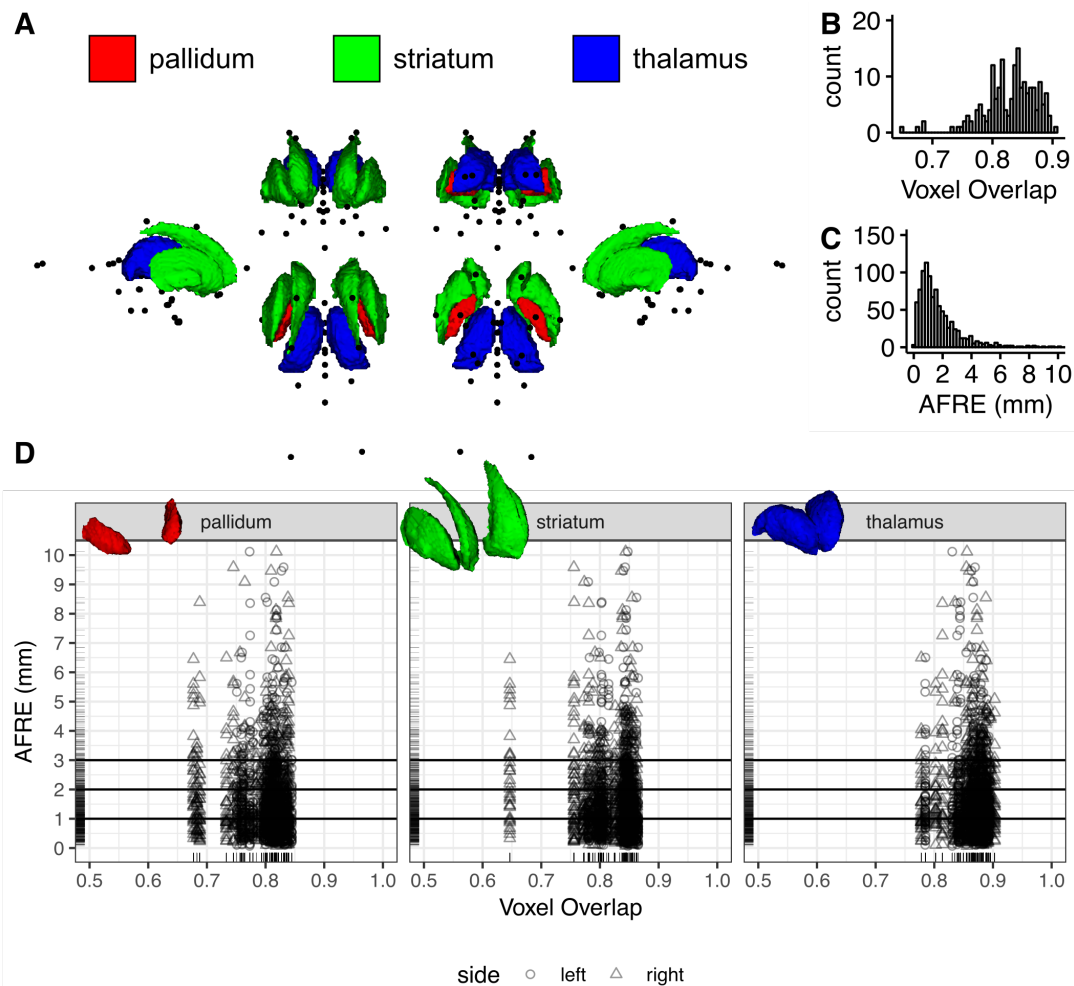

290 **Fig 5.** A comparison of voxel overlap and distance metrics for establishing spatial correspondence between brain regions as  
291 evaluated on fMRIPrep output. (A) Multiple views showing the location of AFIDs (black dots) relative to three commonly used  
292 ROIs used in voxel overlap measures (the pallidum, striatum, and thalamus). (B,C) The histograms for voxel overlap (Jaccard  
293 index) and AFRE, respectively. The distribution for AFRE is more unimodal with a more interpretable dynamic range (in mm)  
294 compared to voxel overlap. Trellis plots demonstrate evidence of focal misregistrations identified by AFRE not apparent when  
295 looking at ROI-based voxel overlap alone (D).  
296  
297

298  
299

**Table 3.** Voxel overlap (Jaccard and Kappa) of the pallidum, striatum, and thalamus after linear registration only and combined linear/nonlinear registration.

| roi      | side  | Jaccard   |           | * | Kappa     |           | * |
|----------|-------|-----------|-----------|---|-----------|-----------|---|
|          |       | lin       | nlin      |   | lin       | nlin      |   |
| pallidum | left  | 0.54±0.13 | 0.80±0.03 | * | 0.69±0.11 | 0.89±0.02 | * |
|          | right | 0.55±0.12 | 0.79±0.05 | * | 0.70±0.11 | 0.88±0.03 | * |
| striatum | left  | 0.53±0.14 | 0.83±0.03 | * | 0.68±0.13 | 0.91±0.02 | * |
|          | right | 0.55±0.15 | 0.82±0.05 | * | 0.70±0.13 | 0.90±0.03 | * |
| thalamus | left  | 0.70±0.11 | 0.86±0.03 | * | 0.82±0.08 | 0.93±0.02 | * |
|          | right | 0.69±0.11 | 0.87±0.03 | * | 0.81±0.08 | 0.93±0.02 | * |

300

\* significant after FDR corrected (q-value < 0.05)

301

Improvements in overlap were identified when going from linear to combined linear/nonlinear transformations (Table 3). Some heterogeneity in values was noted between ROIs with voxel overlap measures observed to be lowest for the pallidum (the smallest structure evaluated). All Jaccard values after nonlinear transformation were greater than 0.7 (greater than 0.8 for Dice kappa), generally considered to represent good correspondence between two registered images. For simplicity, we report the Jaccard coefficient as our measure of voxel overlap for all subsequent analyses.

307

308

Mean AFRE improved from 3.40 +/- 2.55 mm with linear transformation alone to 1.80 +/- 2.09 with combined linear/nonlinear transformation (p-value < 0.001). AFRE was significantly decreased with nonlinear registration for all AFIDs except the pineal gland (AFID14). AFRE was observed to be higher than mean AFLE measures (see Phase 2: 0.93 +/- 0.73 mm) across the same subjects providing evidence that registration error is detectable beyond the limits of localization error. The number of outlier AFIDs with AFRE > 3 mm (more than 2 standard deviations above the mean AFLE found in Phase 2 for the same subjects) was 135/960 (14.06%), representing 22/32 (68.75%) unique AFIDs identified as misregistered. Each independent OASIS-1 subject had at least one AFID with AFRE > 3 mm with a mean maximum AFRE of 7.5 mm (Range: 3.16-32.78 mm). Although AFLE and AFRE were statistically correlated, the effect size was small (Kendall tau = 0.15; p-value < 0.001; Supporting Information S3 file).

318

319

Subgroup analysis for each AFID is summarized in Table 4. AC and PC had the lowest mean AFRE at 0.36 +/- 0.21 and 0.57 +/- 0.29 mm, respectively. However, registration errors as high as 1.64 mm were

320

321 observed for PC. The ventricles appeared particularly difficult to align on subgroup analysis of the AFIDs.  
322 The highest AFRE among all 32 AFIDs was observed for the right and left ventral occipital horns  
323 (AFID29-30) at 3.44 +/- 5.77 and 4.51 +/- 6.28 mm respectively with errors in certain cases over 20 mm  
324 (OAS1\_0109 and OAS1\_0203; Supporting Information S3 file). Similarly, the lateral ventricle features  
325 (AFID15-18) also demonstrated high AFRE ranging from 2.11-3.01 mm on average and up to 7 mm or  
326 more. Finally, the alignment of the temporal horn features (AFID21-26) also support this observation with  
327 mean errors of 1.67-2.41 mm with observed errors over 5 mm.

328

329 AFRE was negatively correlated with voxel overlap but the estimates were small ( $\tau = -0.02$ ;  $p$ -value =  
330 0.03). Subgroup analysis demonstrated the same negative trends for the right pallidum and striatum but  
331 these results did not survive multiple comparisons correction (Fig 5D). No correlation between voxel  
332 overlap measures and individual AFID AFREs survived multiple comparisons correction. Comparing  
333 histograms, AFRE demonstrated a more unimodal distribution peaking between 1-2 mm (Fig 5B) while  
334 voxel overlap exhibited two peaks within the 0.8-0.9 range (Fig 5C). The AFRE plot also demonstrated a  
335 longer tail up to 10 mm, thus permitting a broader dynamic range in which to judge the quality of  
336 registration. In contrast, voxel overlap metrics were sparse in the lower range making interpretation more  
337 difficult. Finally, we observed that even where voxel overlap was high, suggesting good spatial  
338 correspondence, high AFRE values were also observed for certain AFIDs (see Fig 5D). These represent  
339 focal AFID locations where two images are misregistered despite stable voxel overlap results (Fig 6).

340



341 **Table 4.** AFRE after linear registration alone and combined linear/nonlinear registration.

| AFID | Description                    | Mean AFRE<br>mean ± sd (max) |                   |   |
|------|--------------------------------|------------------------------|-------------------|---|
|      |                                | lin                          | nlin              |   |
| 01   | AC                             | 2.15±0.97 (4.96)             | 0.36±0.21 (0.99)  | * |
| 02   | PC                             | 1.83±0.96 (4.58)             | 0.57±0.29 (1.64)  | * |
| 03   | infracollicular sulcus         | 2.20±1.23 (5.71)             | 0.93±0.53 (2.11)  | * |
| 04   | PMJ                            | 2.50±1.36 (6.06)             | 0.68±0.43 (2.13)  | * |
| 05   | superior interpeduncular fossa | 2.35±1.06 (4.75)             | 0.76±0.37 (1.69)  | * |
| 06   | R superior LMS                 | 2.07±0.95 (4.32)             | 1.17±0.74 (3.52)  | * |
| 07   | L superior LMS                 | 2.03±0.85 (4.22)             | 1.43±0.77 (2.88)  | * |
| 08   | R inferior LMS                 | 2.45±1.37 (7.50)             | 1.78±1.11 (5.41)  | * |
| 09   | L inferior LMS                 | 2.54±1.26 (6.63)             | 1.83±0.96 (3.99)  | * |
| 10   | culmen                         | 4.50±2.93 (12.72)            | 2.73±2.81 (10.12) | * |
| 11   | intermammillary sulcus         | 2.81±1.62 (6.30)             | 1.44±0.60 (2.73)  | * |
| 12   | R MB                           | 2.72±1.67 (6.90)             | 0.93±0.48 (1.90)  | * |
| 13   | L MB                           | 2.84±1.70 (6.14)             | 1.01±0.62 (2.93)  | * |
| 14   | pineal gland                   | 2.53±1.39 (5.70)             | 2.01±1.24 (6.16)  |   |
| 15   | R LV at AC                     | 4.44±1.84 (7.90)             | 2.70±1.59 (7.85)  | * |
| 16   | L LV at AC                     | 4.50±1.95 (8.40)             | 2.11±1.72 (7.92)  | * |
| 17   | R LV at PC                     | 4.81±2.54 (10.07)            | 2.96±2.42 (9.46)  | * |
| 18   | L LV at PC                     | 4.80±2.64 (10.34)            | 3.01±2.22 (8.13)  | * |
| 19   | genu of CC                     | 3.73±1.82 (7.88)             | 1.56±0.76 (3.32)  | * |
| 20   | splenium                       | 2.96±1.88 (7.57)             | 0.97±0.60 (2.93)  | * |
| 21   | R AL temporal horn             | 3.79±1.71 (7.50)             | 1.70±1.09 (5.23)  | * |
| 22   | L AL temporal horn             | 3.62±1.45 (6.98)             | 1.67±0.98 (4.31)  | * |
| 23   | R superior AM temporal horn    | 3.34±1.63 (7.25)             | 1.93±1.34 (6.85)  | * |
| 24   | L superior AM temporal horn    | 3.44±1.80 (8.20)             | 1.67±1.25 (5.80)  | * |
| 25   | R inferior AM temporal horn    | 4.02±1.97 (8.32)             | 2.41±1.16 (5.61)  | * |
| 26   | L inferior AM temporal horn    | 4.13±1.70 (8.20)             | 2.21±1.09 (4.84)  | * |
| 27   | R indusium griseum origin      | 3.36±2.07 (8.46)             | 2.06±1.49 (6.40)  | * |
| 28   | L indusium griseum origin      | 3.60±1.68 (8.83)             | 2.05±1.37 (5.00)  | * |
| 29   | R ventral occipital horn       | 5.86±6.32 (36.26)            | 3.44±5.77 (32.78) | * |
| 30   | L ventral occipital horn       | 6.99±6.72 (33.74)            | 4.51±6.28 (29.76) | * |
| 31   | R olfactory sulcal fundus      | 2.83±1.36 (7.50)             | 1.37±0.95 (3.44)  | * |
| 32   | L olfactory sulcal fundus      | 2.94±1.28 (6.49)             | 1.57±0.84 (3.41)  | * |

342 \* significant after FDR corrected (q-value < 0.05)

343

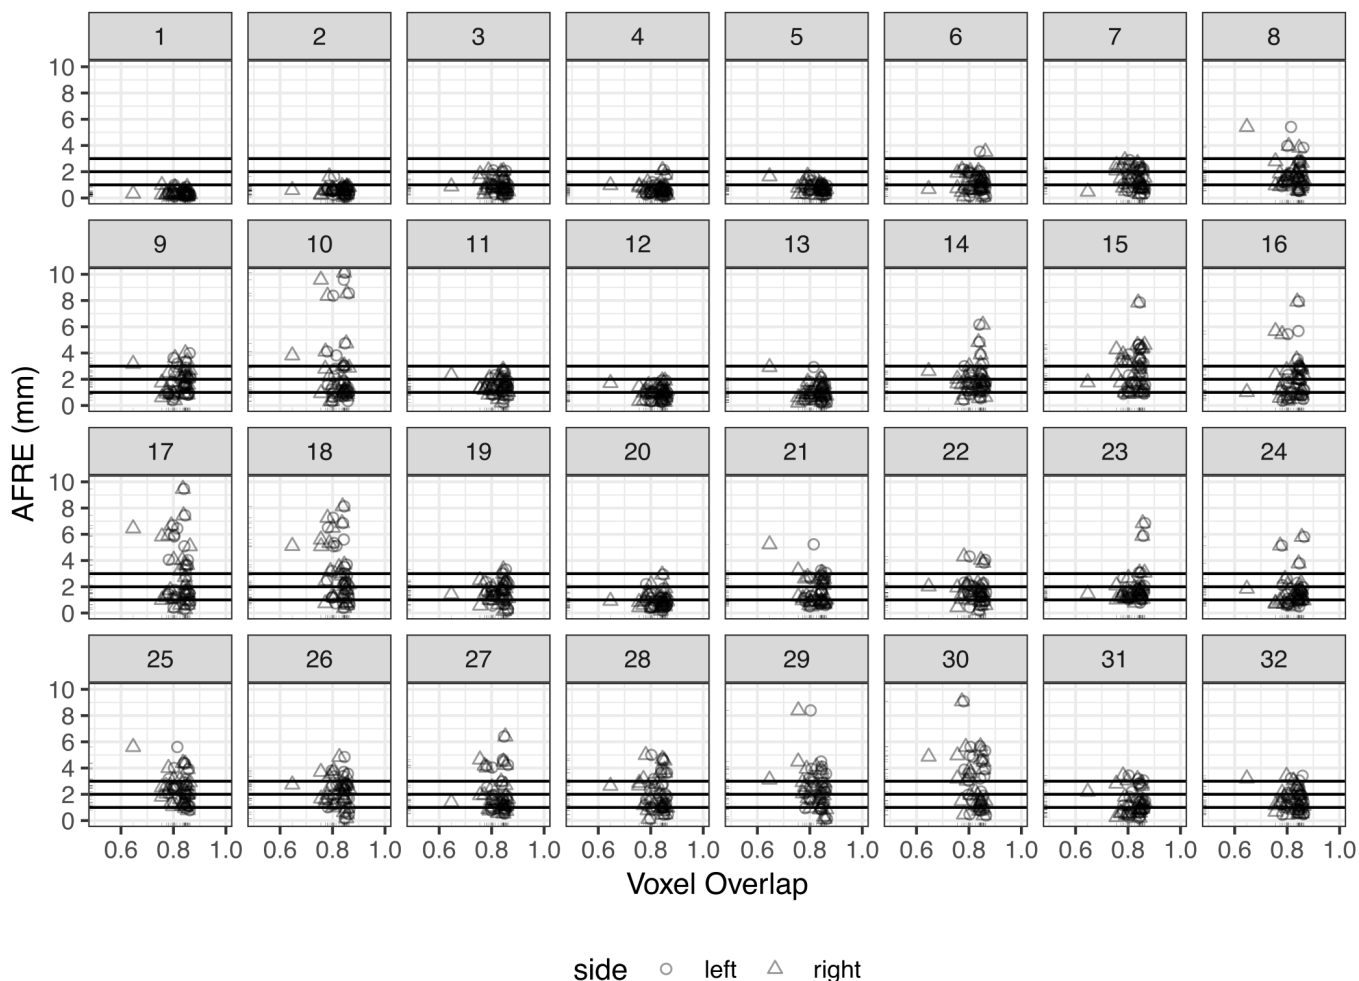

344

345 **Fig 6.** Investigating relationships between voxel overlap of the striatum and AFRE for each AFID. Focal misregistrations are  
 346 identified using AFRE for the following AFIDs: 8-10, 14-18, 21-30. The most commonly misregistered regions include the inferior  
 347 mesencephalon, superior vermis, pineal gland, indusium griseum, and ventricular regions. Horizontal lines are used to  
 348 demarcate tiers of AFLE error above which AFRE values are beyond a threshold of localization error alone, i.e. the top  
 349 horizontal line at 3 mm represents more than 2 standard deviations beyond the mean AFLE. Separate plots for the pallidum and  
 350 thalamus ROIs are provided in the Supporting Information S3 file.

## 351 Phase 4: Evaluating template-to-template registration

352 Mean AFLE for BigBrainSym and MNI2009bSym was 0.59 +/- 0.40 mm combined with no outliers  
 353 (BigBrainSym: 0.63 +/- 0.50 mm; MNI2009bSym: 0.55 +/- 0.26 mm). We highlighted AFRE values  
 354 beyond a threshold of 2 mm given this represents more than 2 standard deviations beyond the mean  
 355 AFLE in the templates being studied. AFRE values beyond this minimum were flagged as highlighting  
 356 focal misregistrations between templates.

357  
358  
359

**Table 5.** AFIDs demonstrating evidence of template-to-template misregistration for BigBrainSym with MNI2009bSym and BigBrainSym with MNI2009bAsym as well as correspondence differences between MNI2009bAsym and MNI2009bSym.

| AFID | Description                 | AFRE (mm)                  |   |                             |   | Distance** (mm)             |   |
|------|-----------------------------|----------------------------|---|-----------------------------|---|-----------------------------|---|
|      |                             | BigBrainSym vs MNI2009bSym |   | BigBrainSym vs MNI2009bAsym |   | MNI2009bAsym vs MNI2009bSym |   |
| 03   | infracollicular sulcus      | 6.36                       | * | 5.48                        | * | 0.98                        |   |
| 09   | L inferior LMS              | 2.78                       | * | 2.48                        | * | 0.68                        |   |
| 10   | culmen                      | 9.27                       | * | 9.39                        | * | 0.21                        |   |
| 14   | pineal gland                | 4.42                       | * | 4.16                        | * | 0.41                        |   |
| 16   | L LV at AC                  | 2.05                       | * | 1.22                        |   | 0.86                        |   |
| 20   | splenium                    | 2.23                       | * | 2.20                        | * | 0.10                        |   |
| 22   | L AL temporal horn          | 4.69                       | * | 3.44                        | * | 2.45                        | * |
| 26   | L inferior AM temporal horn | 1.88                       |   | 2.58                        | * | 0.98                        |   |
| 27   | R indusium griseum origin   | 1.21                       |   | 3.60                        | * | 2.81                        | * |
| 28   | L indusium griseum origin   | 0.74                       |   | 2.88                        | * | 2.29                        | * |
| 29   | R ventral occipital horn    | 2.54                       | * | 3.99                        | * | 1.63                        |   |
| 30   | L ventral occipital horn    | 5.88                       | * | 4.22                        | * | 2.00                        | * |
| 31   | R olfactory sulcal fundus   | 2.62                       | * | 1.84                        |   | 1.10                        |   |
| 32   | L olfactory sulcal fundus   | 3.06                       | * | 4.21                        | * | 1.24                        |   |

360  
361

\* AFRE > 2 mm

\*\* Distance between fiducials (not truly a registration error since templates are designed to be in different spaces)

362 The mean AFRE between BigBrainSym and MNI2009bSym was 2.16 +/- 1.99 mm and between  
363 BigBrainSym and MNI2009bAsym was 2.30 +/- 1.83 mm, both above threshold. The largest error was  
364 9.27 mm (MNI2009bSym) and 9.38 mm (MNI2009bAsym), found at the culmen (AFID10). Out of the 32  
365 AFIDs defined, 11 (34.4%) were above threshold for the symmetric template and 12 (37.5%) for the  
366 asymmetric template. The most prominent misregistrations tended to occur in the posterior brainstem  
367 with the infracollicular sulcus (AFID03) and pineal gland (AFID14) quantified as 6.36 mm and 4.42 mm  
368 AFRE, respectively. These registration errors can be seen in Fig 7 and are summarized by AFID in Table  
369 5. In addition, AFRE up to 2.78 mm were observed for AFIDs placed along the lateral mesencephalic  
370 sulcus (AFID06-09) and at the superior interpeduncular fossa (AFID05), which represent features  
371 demarcating the lateral and superior bounds of midbrain registration. Registration differences between  
372 these templates was also above threshold for the left lateral ventricle at the anterior commissure  
373 (AFID16), splenium (AFID20), left anterolateral temporal horn (AFID22), bilateral ventral occipital horns

374 (AFID29-30), and bilateral olfactory sulcal fundi (AFID31-32). No correlation between AFRE and AFLE  
375 was found using BigBrainSym AFLE ( $\tau = 0.071$ ;  $p$ -value = 0.57) or MNI2009bSym AFLE ( $\tau = -0.046$ ;  
376  $p$ -value = 0.71). Interestingly, AFRE was somewhat lower with MNI2009bAsym in many midline AFIDs  
377 but higher for certain lateral landmarks, i.e. the left inferior anteromedial temporal horn and bilateral  
378 origin of the indusium griseum (AFID26-28).

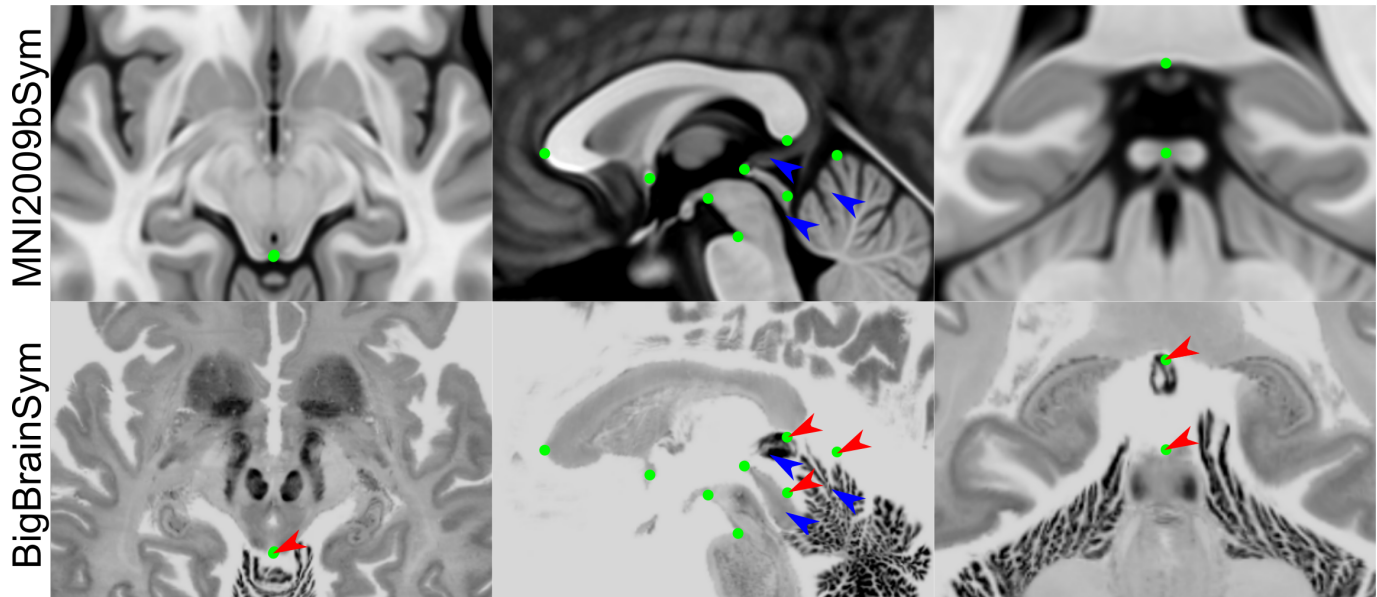

379

380 **Fig 7.** Select views demonstrating registration errors between BigBrainSym and MNI2009bSym. The green dots represent the  
381 optimal AFID coordinates in MNI2009bSym space projected onto both templates to provide a basis for comparing registration  
382 differences. While many of the midline AFIDs are stable across both templates, the infracollicular sulcus, pineal gland, splenium,  
383 and culmen are misregistered in BigBrainSym (red arrows). The AFIDs draw attention to registration differences in the  
384 BigBrainSym space in the tectal plate, pineal gland, and superior vermis (blue arrows).  
385

386 Finally, we explored the differences in correspondence between the MNI2009bSym and MNI2009bAsym.  
387 Note that these differences are not registration errors per se, as the two are not meant to be in the exact  
388 same coordinate space. The differences were generally more subtle ( $0.88 \pm 0.68$  mm) but 4 AFIDs  
389 (12.5%) were found to be above threshold. As expected, correspondence differences greater than 2 mm  
390 occurred in lateral rather than midline AFIDs, specifically at the left anterolateral temporal horn (AFID22),  
391 bilateral origins of the indusium griseum (AFID27-28), and left lateral ventral occipital horn (AFID30). No  
392 correlations between correspondence and AFLE were found ( $\tau = 0.210$ ;  $p$ -value = 0.09).

## 393 Discussion

394 The present findings demonstrate that a series of anatomical fiducials, referred to here as AFIDs, can be  
395 consistently placed on standard structural MR images and can be used to quantify the degree of spatial  
396 alignment between brain images in millimeters. We found that AFIDs are reproducible, not overtly  
397 manually intensive (20-40 minutes once trained), and more sensitive to local registration errors than  
398 standard voxel overlap measures. Our entire protocol and study framework leverages open resources  
399 and tools, and has been developed with full transparency in mind so that others may freely use, adopt,  
400 and modify.

401  
402 The work presented here is inspired heavily by classical stereotactic methods (J Talairach et al., 1957),  
403 where point-based correspondence has been used to align brain templates with patient anatomy to  
404 enable atlas-based surgical targeting. The anterior and posterior commissure were originally identified as  
405 prominent intraventricular features based on air studies, prior to the invention of computed tomography  
406 or MRI. The AC and PC have proven to be reliable features on MRI and were adopted by neuroscientists  
407 for the alignment of brain images to templates, in what is referred to as the Talairach grid normalization  
408 procedure (Brett, Johnsrude, & Owen, 2002; A. Evans et al., 1992; Jean Talairach & Tournoux, 1988).  
409 The advent of robust and openly available software for automatic or semi-automatic labeling of regions-  
410 of-interest in brain images has led to a relative underemphasis of point-based alignment. We  
411 demonstrate here that point-based metrics are more sensitive to focal misregistrations than voxel overlap  
412 measures and quantified in millimeters.

413  
414 Tolerance to focal misregistration in images undoubtedly will depend on the application; but there is no  
415 doubt that poor image correspondence can result in inaccurate (and possibly erroneous) predictions and  
416 conclusions in neuroimaging studies. Our results evaluating correspondence error in an fMRI  
417 preprocessing pipeline revealed local template misregistrations of 1.80 +/- 2.09 mm. For many fMRI or  
418 diffusion-based applications, this mean error is about the size of a voxel; and thus may be within an



419 acceptable tolerance. However, mean maximum errors of over 7 mm were also observed and may begin  
420 to impact the sensitivity to discovery as well as the accuracy of localization of affected brain regions in a  
421 task or connectivity analyses. These misregistrations also may affect the interpretation of voxel-based  
422 and deformation-based morphometry studies that seek to investigate subtle shape differences between  
423 study populations. Finally, minimizing registration error becomes particularly critical for analyses  
424 pertaining to stereotactic interventions like deep brain stimulation (DBS) where millimeters can represent  
425 the difference between optimal therapy and side effects.

## 426 Protocol development and validation

427 After a single training session, novice raters could place AFIDs at a mean AFLE of approximately 1-1.5  
428 mm across all AFID32 points. Placement error varied from one template to another and among AFIDs  
429 (Supporting Information S1 file). Raters had the least amount of error with placements for the  
430 MNI2009bAsym and Agile12v2016 templates. In contrast, fiducial placement errors were higher when  
431 raters were asked to place AFIDs for individual subjects, i.e. Colin27 as well as the OASIS-1 database.  
432 Repeatability was assessed using measures of intra-rater and inter-rater AFLE. Intra-rater AFLE was  
433 lowest for the MNI2009bAsym and highest in Colin27 (Table 1). Inter-rater AFLE was again lowest for  
434 MNI2009bAsym and highest in Colin27 and the OASIS-1 datasets. This demonstrates how AFIDs are  
435 more difficult to place due to individual variability versus in population templates where the individual  
436 nuances of these features may be effectively blurred out. Overall, the placement error remains  
437 acceptable (1-2 mm) among all annotated images.

438

439 The AC and PC were the most reliably identifiable AFIDs with mean AFLE of less than 0.5 mm and inter-  
440 rater AFLE of 0.5-1 +/- 0.3 mm observed. These results compared favorably to an analysis of  
441 experienced neurosurgeons by Pallaravam and colleagues placing the same AC-PC points where they  
442 observed a point placement error (equivalent to the inter-rater AFLE metric used here) that was  
443 surprisingly higher at 1-2 mm +/- 1.5 mm (Pallavaram et al., 2008). We speculate that the higher  
444 variability in the referenced study was the lack of restriction on how the AC-PC landmarks were placed;

445 that is, some stereotactic neurosurgeons continue to use the intraventricular edge of each commissure,  
446 which was the classical technique used by Talairach during air studies, while others used the center of  
447 each commissure (Horn et al., 2017). The distance from the center to the ventricular edge can be several  
448 millimeters likely accounting for this difference. Overall, our findings demonstrate that enforcing certain  
449 practices such as using the center of each commissure play an important role in the consistency and  
450 standardization of fiducial placement.

451

452 In contrast, certain fiducial points contributed substantially to worse overall estimates of fiducial  
453 localization error. In particular, the bilateral ventral occipital horns (AFID29-30) had higher placement  
454 errors. Placement was particularly inaccurate for individual subjects where the ventricular atrium tapered  
455 completely in many individual subject studies (including Colin27), and thus the posterior continuation into  
456 the occipital horn was sometimes difficult to visualize or resolve at all. The bilateral origins of the  
457 indusium griseum (AFID27-28) were also difficult for raters to place consistently.

## 458 Point-based versus ROI-based metrics

459 Previous work has shown that nonlinear registration improves alignment between structures  
460 (Chakravarty et al., 2009; Hellier et al., 2003; Klein et al., 2009), and that the choice of parameters  
461 matters. These existing studies have mostly used voxel overlap measures to support their findings. Our  
462 results are also in-line with prior work but also demonstrate how AFIDs are complementary and more  
463 sensitive than ROI-based metrics for evaluating both local and global spatial correspondence of brain  
464 images (see Fig 5).

465

466 We were able to compare the relative efficacy of AFRE and voxel overlap for subjects from the OASIS-1  
467 database and several commonly used templates. AFRE had a more unimodal distribution and a longer  
468 tail facilitating identification of focal misregistrations between images (Fig 5). On the other hand, the  
469 Jaccard histogram was more sparse towards the tail of the distribution suggesting a poorer ability to  
470 discriminate. One key advantage of AFRE is its interpretability, representing the distance in millimeters

471 between aligned neuroanatomical structures in two images, compared to voxel overlap, which is a  
472 relative measure and unitless. It is commonly perceived in segmentation studies that voxel overlap  
473 measures greater than 0.7 represent accurate correspondence between regions. However, our analysis  
474 demonstrates that even with generally high overlap after nonlinear registration, focal misregistrations of  
475 AFIDs above 7 mm may be identified (Fig 6 and Table 4).

## 476 Subject-to-template registration

477 We chose to evaluate the subject-to-template registrations computed as part of an fMRI processing  
478 pipeline, fMRIPrep (Esteban et al., 2018), as a use case for our AFIDs protocol. Functional MRI studies  
479 may not represent the optimal use case due to the relatively coarse spatial resolution relative to the size  
480 of misregistration effects we can detect with AFIDs, and because most fMRI researchers are focused on  
481 cortical activation while our protocol emphasizes and detects misregistrations in the deep brain regions.  
482 Our choice to investigate fMRIPrep registration performance was motivated by their transparent  
483 approach to the development of preprocessing software for neuroimaging and BIDS integration  
484 (Gorgolewski et al., 2017, 2016). The active developer and support base, as well as growing adoption by  
485 many end-users were other contributing factors. Our analysis revealed misregistrations on the order of  
486 1.80 +/- 2.09 mm and as high as over 30 mm that would be more difficult to identify by qualitative  
487 evaluation or ROI-based analysis alone.

488

489 While this points to potential caution with the use of standardized pipelines like fMRIPrep for template  
490 registration, it should be noted that fMRIPrep was designed with a focus on robustness, rather than  
491 accuracy. The underlying parameters and processing steps used in fMRIPrep are fully transparent. In  
492 addition, the underlying deformable registration software used (Avants et al., 2008) has been  
493 demonstrated to achieve high performance in studies using traditional voxel overlap measures (Klein et  
494 al., 2009). The focal template misregistrations we have identified in fMRIPrep with AFIDs are meant to  
495 serve as a baseline for refinement in future versions that can be compared transparently and potentially  
496 incorporated for testing new versions as part of a continuous integration workflow. Using additional

497 image contrasts (Xiao et al., 2017) or subcortical tissue priors (Ewert et al., 2019) to drive template  
498 registration have been demonstrated using conventional voxel overlap techniques to result in more  
499 optimal registrations that can also be tested using the AFIDs framework.

## 500 Template-to-template registration

501 We recommend that imaging scientists exercise caution when displaying statistical maps using a  
502 template other than the one to which the original deformations were performed. For example, it has  
503 become increasingly common to project statistical maps and subject data registered to MNI space using  
504 BigBrain for visualization purposes. In this study, we identified clear evidence of registration differences  
505 between several templates commonly assumed to be in the same coordinate space: BigBrainSym and  
506 MNI2009bSym, and even greater between BigBrainSym and MNI2009bAsym because of the differences  
507 in AFID locations in MNI2009bSym and MNI2009bAsym. Specifically, misregistrations as high as over 9  
508 mm have been identified. Many of these errors occur in the midbrain region (Table 5), which would have  
509 implications in particular if using BigBrainSym to project locations of electrode implantations. In support  
510 of other recent work (Horn et al., 2017), this study highlights the importance of understanding which  
511 exact template one is using for processing and analysis: that multiple "MNI" templates exist (with  
512 different version dates, types, and symmetry), as do registration differences between these templates.

## 513 Teaching neuroanatomy

514 Our AFID32 protocol may also hold particular value for teaching neuroanatomy. In fact, evidence from  
515 our study suggests that even relative novices can be trained to place AFIDs accurately, including the AC  
516 and PC, with comparable accuracy and variability to trained neurosurgeons (Table 2). By releasing the  
517 data acquired in this study, we provide a normative distribution of AFID placements that can be used to  
518 quantify how accurately new trainees can place points. These measures can be used to gauge the  
519 comprehension of students regarding the specific location of neuroanatomical structures in a quantitative  
520 (millimetric) manner and focus efforts on consolidating understanding based on where localization errors

521 were higher. To date, over a series of locally-held workshops and tutorials, over 60 students have been  
522 trained to complete the AFID32 protocol.

## 523 Limitations and future work

524 While we have found the AFIDs proposed to be quite reliable, there is clearly location-related  
525 heterogeneity in placement error. We make no claims that this set of anatomical fiducials is optimal and  
526 in the future, other locations may prove to be more effective than others. Also, for this first proposed set  
527 of AFIDs, we limited our locations to deep structures where less inter-subject variability exists compared  
528 to cortical features (Thompson et al., 1996); future extensions could include linking our workflow with  
529 cortical surface-based (B. Fischl, 2004) and sulcal-based (Hellier et al., 2003; Mangin et al., 2015; Perrot,  
530 Rivière, & Mangin, 2011) methods of spatial correspondence. Development of similar protocols for other  
531 neuroimaging modalities such as T2-weighted or diffusion-based contrasts may also be of value. In  
532 addition, fiducial localization error may be biased by how the raters were taught to place the fiducials; in  
533 our case, we organized an initial interactive tutorial session, and provided text and picture-based  
534 resources of how to place the AFIDs. It is also possible that AFLE would be lower if performed by a more  
535 experienced group of raters. Also, how AFID placement behaves in the presence of lesional pathology  
536 remains an open question. We have made the annotations and images available to allow other groups to  
537 propose other AFID locations and descriptions that could be similarly validated. We plan to post any  
538 modifications to the protocol as separate versions at the linked repository.

539

540 The AFIDs protocol requires correct placement of the anterior commissure (AFID01) and posterior  
541 commissure (AFID02) points. We made this decision as it helps to align the brain images into a more  
542 standard orientation for subsequent placement of bilateral fiducials. In particular, 4 of the AFIDs are  
543 dependent on AC-PC alignment (the lateral ventricles at AC and PC in the coronal plane). It is possible  
544 that error in AFID placements could be compounded by initial error in placement of AC and PC.  
545 Fortunately, AC and PC can be placed with high trueness and precision (< 1 mm) (Table 2), consistent  
546 with prior studies (Liu & Dawant, 2015). We made the decision to perform AC-PC alignment to permit



547 more accurate placement of lateral AFIDs, which may otherwise have appeared quite oblique from each  
548 other if the individual's head was tilted in the scanner. Thus, on balance, AC-PC alignment probably  
549 mitigates placement error in lateral AFIDs compared to placing fiducials in the native MRI space. Further  
550 research can examine these potential spatial biases more systematically.

551

552 Beyond evaluating correspondence, AFIDs could be used for point-based inter-subject or subject-to-  
553 template registration. AFIDs used in combination with classic rigid registration algorithms such as  
554 Iterative Closest Point (Besl & McKay, 1992) may result in more optimal initial linear registration between  
555 images. In addition, point-based deformable registration using (B-splines) may produce more efficient,  
556 lower order deformable registrations between two images (Bookstein, 1997). To prevent circular  
557 reasoning, we thought this would be best evaluated as independent studies. Finally one compelling  
558 extension of this work would be to automate or semi-automate AFID placement, which would enable  
559 inclusion of AFID-based metrics in standardized workflows involving template or intersubject registration.

## 560 Conclusions

561 Our proposed framework consists of the identification of anatomical fiducials, AFIDs, in structural  
562 magnetic resonance images of the human brain. Validity has been established using several openly  
563 available brain templates and datasets. We found that novice users could be trained to reliably place  
564 these points over a series of interactive training sessions to within millimeters of placement accuracy. As  
565 an example of different use cases, we examined the utility of our proposed protocol for evaluating  
566 subject-to-template and template-to-template registration revealing that AFIDs are sensitive to focal  
567 misregistrations that may be missed using other commonly used evaluation methods. This protocol holds  
568 value for a broad number of applications including intersubject alignment and teaching neuroanatomy.

569

## 570 References

- 571 Amunts, K., Lepage, C., Borgeat, L., Mohlberg, H., Dickscheid, T., Rousseau, M.-É., ... Evans, A. C.  
572 (2013). BigBrain: an ultrahigh-resolution 3D human brain model. *Science (New York, N.Y.)*,  
573 *340*(6139), 1472–5. <http://doi.org/10.1126/science.1235381>
- 574 Avants, B. B., Epstein, C. L., Grossman, M., & Gee, J. C. (2008). Symmetric diffeomorphic image  
575 registration with cross-correlation: Evaluating automated labeling of elderly and neurodegenerative  
576 brain. *Medical Image Analysis*, *12*(1), 26–41. <http://doi.org/10.1016/j.media.2007.06.004>
- 577 Besl, P. J., & McKay, H. D. (1992). A method for registration of 3-D shapes. *IEEE Transactions on*  
578 *Pattern Analysis and Machine Intelligence*, *14*(2), 239–256. <http://doi.org/10.1109/34.121791>
- 579 Bookstein, F. (1997). Landmark methods for forms without landmarks: morphometrics of group  
580 differences in outline shape. *Med Image Anal*, *1*(3), 225–243.
- 581 Brett, M., Johnsrude, I. S., & Owen, A. M. (2002). The problem of functional localization in the human  
582 brain. *Nature Reviews. Neuroscience*, *3*(3), 243–9. <http://doi.org/10.1038/nrn756>
- 583 Chakravarty, M. M., Sadikot, A. F., Germann, J., Bertrand, G., & Collins, D. L. (2008). Towards a  
584 validation of atlas warping techniques. *Medical Image Analysis*, *12*(6), 713–726.  
585 <http://doi.org/10.1016/j.media.2008.04.003>
- 586 Chakravarty, M. M., Sadikot, A. F., Germann, J., Hellier, P., Bertrand, G., & Collins, D. L. (2009).  
587 Comparison of piece-wise linear, linear, and nonlinear atlas-to-patient warping techniques: Analysis  
588 of the labeling of subcortical nuclei for functional neurosurgical applications. *Human Brain Mapping*,  
589 *30*(11), 3574–3595. <http://doi.org/10.1002/hbm.20780>
- 590 Collins, D. L., Neelin, P., Peters, T. M., & Evans, A. C. (1994). Automatic 3D intersubject registration of  
591 MR volumetric data in standardized Talairach space. *Journal of Computer Assisted Tomography*,  
592 *18*(2), 192–205. Retrieved from <http://www.ncbi.nlm.nih.gov/pubmed/8126267>
- 593 Dale, A., Fischl, B., & Sereno, M. (1999). Cortical surface-based analysis. I. Segmentation and surface  
594 reconstruction. *Neuroimage*, *9*(2), 179–194. <http://doi.org/10.1006/nimg.1998.0395>
- 595 Dandy, W. E. (1918). Ventriculography following the injection of air into the cerebral ventricles. *Annals of*

- 596        *Surgery*, 68(1), 5–11. Retrieved from  
597        [http://www.pubmedcentral.nih.gov/articlerender.fcgi?artid=1426769&tool=pmcentrez&rendertype=a](http://www.pubmedcentral.nih.gov/articlerender.fcgi?artid=1426769&tool=pmcentrez&rendertype=abstract)  
598        bstract
- 599        Eickhoff, S. B., Laird, A. R., Grefkes, C., Wang, L. E., Zilles, K., & Fox, P. T. (2009). Coordinate-based  
600        activation likelihood estimation meta-analysis of neuroimaging data: A random-effects approach  
601        based on empirical estimates of spatial uncertainty. *Human Brain Mapping*, 30(9), 2907–2926.  
602        <http://doi.org/10.1002/hbm.20718>
- 603        Esteban, O., Markiewicz, C. J., Blair, R. W., Moodie, C. A., Ayse, I., Erramuzpe, A., ... Gorgolewski, K. J.  
604        (2018). FMRIPrep : a robust preprocessing pipeline for functional MRI, 5, 1–20.  
605        <http://doi.org/10.1101/306951>
- 606        Evans, A. C., Janke, A. L., Collins, D. L., & Baillet, S. (2012). Brain templates and atlases. *NeuroImage*,  
607        62(2), 911–922. <http://doi.org/10.1016/j.neuroimage.2012.01.024>
- 608        Evans, A., Marrett, S., Neelin, P., Collins, L., Worsley, K., Dai, W., ... Bub, D. (1992). Anatomical  
609        mapping of functional activation in stereotactic coordinate space. *Neuroimage*, 1(1), 43–53.
- 610        Ewert, S., Horn, A., Finkel, F., Li, N., Kühn, A. A., & Herrington, T. M. (2019). Optimization and  
611        comparative evaluation of nonlinear deformation algorithms for atlas-based segmentation of DBS  
612        target nuclei. *NeuroImage*, 184(August 2018), 586–598.  
613        <http://doi.org/10.1016/j.neuroimage.2018.09.061>
- 614        Fedorov, A., Beichel, R., Kalpathy-Cramer, J., Finet, J., Fillion-Robin, J. C., Pujol, S., ... Kikinis, R.  
615        (2012). 3D Slicer as an image computing platform for the Quantitative Imaging Network. *Magnetic*  
616        *Resonance Imaging*, 30(9), 1323–1341. <http://doi.org/10.1016/j.mri.2012.05.001>
- 617        Fischl, B. (2004). Automatically Parcellating the Human Cerebral Cortex. *Cerebral Cortex*, 14(1), 11–22.  
618        <http://doi.org/10.1093/cercor/bhg087>
- 619        Fischl, B. (2012). FreeSurfer. *NeuroImage*, 62(2), 774–781.  
620        <http://doi.org/10.1016/j.neuroimage.2012.01.021>
- 621        Fitzpatrick, J. M., & West, J. B. (2001). The distribution of target registration error in rigid-body point-  
622        based registration. *IEEE Transactions on Medical Imaging*, 20(9), 917–927.

- 623 <http://doi.org/10.1109/42.952729>
- 624 Fitzpatrick, J. M., West, J. B., & Maurer, C. R. (1998). Predicting error in rigid-body point-based  
625 registration. *IEEE Transactions on Medical Imaging*, 17(5), 694–702.  
626 <http://doi.org/10.1109/42.736021>
- 627 Fonov, V., Evans, A. C., Botteron, K., Almli, R. R., McKinstry, R. C., Collins, L. L., & Group", "Brain  
628 Development Cooperative. (2011). Unbiased average age-appropriate atlases for pediatric studies.  
629 *NeuroImage*, 54(1), 313–327. <http://doi.org/10.1016/j.neuroimage.2010.07.033>
- 630 Gorgolewski, K. J., Alfaro-almagro, F., Auer, T., Bellec, P., Capotă, M., Chakravarty, M. M., ... Yarkoni,  
631 T. (2017). BIDS apps: Improving ease of use, accessibility, and reproducibility of neuroimaging data  
632 analysis methods. *PLoS Computational Biology*, 13(3), e1005209.  
633 <http://doi.org/10.1371/journal.pcbi.1005209>
- 634 Gorgolewski, K. J., Auer, T., Calhoun, V. D., Craddock, R. C., & Das, S. (2016). The brain imaging data  
635 structure , a format for organizing and describing outputs of neuroimaging experiments, 1–9.
- 636 Gorgolewski, K. J., Varoquaux, G., Rivera, G., Schwarz, Y., Ghosh, S. S., Maumet, C., ... Margulies, D.  
637 S. (2015). NeuroVault.org: a web-based repository for collecting and sharing unthresholded  
638 statistical maps of the human brain. *Frontiers in Neuroinformatics*, 9(April), 1–9.  
639 <http://doi.org/10.3389/fninf.2015.00008>
- 640 Hellier, P., Barillot, C., Corouge, I., Gibaud, B., Le Goualher, G., Collins, D. L., ... Johnson, H. J. (2003).  
641 Retrospective evaluation of intersubject brain registration. *IEEE Transactions on Medical Imaging*,  
642 22(9), 1120–1130. <http://doi.org/10.1109/TMI.2003.816961>
- 643 Holmes, C. J., Hoge, R., Collins, L., Woods, R., Toga, A. W. A., & Evans, A. C. A. (1998). Enhancement  
644 of MR Images Using Registration for Signal Averaging. *Journal of Computer Assisted Tomography*,  
645 22(2), 324–333. <http://doi.org/10.1097/00004728-199803000-00032>
- 646 Horn, A., Kühn, A. A., Merkl, A., Shih, L., Alterman, R., & Fox, M. (2017). Probabilistic conversion of  
647 neurosurgical DBS electrode coordinates into MNI space. *NeuroImage*.  
648 <http://doi.org/10.1016/j.neuroimage.2017.02.004>
- 649 Horsley, V., & Clarke, R. H. (1908). The structure and functions of the cerebellum examined by a new

- 650 method. *Brain*, 31(1), 45–124. <http://doi.org/10.1093/brain/31.1.45>
- 651 Klein, A., Andersson, J., Ardekani, B. A., Ashburner, J., Avants, B., Chiang, M.-C., ... Hellier, P. (2009).  
652 Evaluation of 14 nonlinear deformation algorithms applied to human brain MRI registration.  
653 *NeuroImage*, 46(3), 786–802. <http://doi.org/10.1016/j.neuroimage.2008.12.037>
- 654 Lau, J. C., Khan, A. R., Zeng, T. Y., MacDougall, K. W., Parrent, A. G., & Peters, T. M. (2018).  
655 Quantification of local geometric distortion in structural magnetic resonance images: Application to  
656 ultra-high fields. *NeuroImage*, 168, 141–151. <http://doi.org/10.1016/j.neuroimage.2016.12.066>
- 657 Lau, J. C., MacDougall, K. W., Arango, M. F., Peters, T. M., Parrent, A. G., & Khan, A. R. (2017). Ultra-  
658 High Field Template-Assisted Target Selection for Deep Brain Stimulation Surgery. *World*  
659 *Neurosurgery*, 103, 531–537. <http://doi.org/10.1016/j.wneu.2017.04.043>
- 660 Liu, Y., & Dawant, B. M. (2015). Automatic Localization of the Anterior Commissure, Posterior  
661 Commissure, and Midsagittal Plane in MRI Scans using Regression Forests. *IEEE Journal of*  
662 *Biomedical and Health Informatics*, 19(4), 1362–1374. <http://doi.org/10.1109/JBHI.2015.2428672>
- 663 Mangin, J. F., Auzias, G., Coulon, O., Sun, Z. Y., Rivière, D., & Régis, J. (2015). Sulci as Landmarks.  
664 *Brain Mapping: An Encyclopedic Reference*, 2(2015), 45–52. [http://doi.org/10.1016/B978-0-12-](http://doi.org/10.1016/B978-0-12-397025-1.00198-6)  
665 [397025-1.00198-6](http://doi.org/10.1016/B978-0-12-397025-1.00198-6)
- 666 Marcus, D. S., Fotenos, A. F., Csernansky, J. G., Morris, J. C., & Buckner, R. L. (2010). Open Access  
667 Series of Imaging Studies: Longitudinal MRI Data in Nondemented and Demented Older Adults.  
668 *Journal of Cognitive Neuroscience*, 22(12), 2677–2684. <http://doi.org/10.1162/jocn.2009.21407>
- 669 Pallavaram, S., Yu, H., Spooner, J., D’Haese, P. F., Bodenheimer, B., Konrad, P. E., & Dawant, B. M.  
670 (2008). Intersurgeon Variability in the Selection of Anterior and Posterior Commissures and Its  
671 Potential Effects on Target Localization. *Stereotactic and Functional Neurosurgery*, 86, 113–119.  
672 <http://doi.org/10.1159/000116215>
- 673 Perrot, M., Rivière, D., & Mangin, J. F. (2011). Cortical sulci recognition and spatial normalization.  
674 *Medical Image Analysis*, 15(4), 529–550. <http://doi.org/10.1016/j.media.2011.02.008>
- 675 Peters, T. M. (2006). Image-guidance for surgical procedures. *Physics in Medicine and Biology*, 51(14),  
676 R505-40. <http://doi.org/10.1109/NSSMIC.1993.373602>

- 677 Schaltenbrand, G., & Wahren, W. (1977). *Atlas for Stereotaxy of the Human Brain* (2nd ed.). Thieme.
- 678 Talairach, J., David, M., Tournoux, P., Corredor, H., & Kvasina, T. (1957). *Atlas d'anatomie*  
679 *stéréotaxique. Repérage radiologique indirect des noyaux gris centraux des régions*  
680 *mésencephaloso-optique et hypothalamique de l'homme*. Paris, France: Masson & Cie.
- 681 Talairach, J., & Tournoux, P. (1988). *Co-planar stereotaxic atlas of the human brain* (1st ed.). New York:  
682 Thieme. Retrieved from [https://www.amazon.ca/Co-Planar-Stereotaxic-Atlas-Human-](https://www.amazon.ca/Co-Planar-Stereotaxic-Atlas-Human-Brain/dp/0865772932)  
683 [Brain/dp/0865772932](https://www.amazon.ca/Co-Planar-Stereotaxic-Atlas-Human-Brain/dp/0865772932)
- 684 Thompson, P. M., Schwartz, C., Lin, R. T., Khan, A. A., & Toga, A. W. (1996). Three-dimensional  
685 statistical analysis of sulcal variability in the human brain. *The Journal of Neuroscience*, *16*(13),  
686 4261–4274. <http://doi.org/10.1126/science.os-2.68.475>
- 687 Wang, B. T., Poirier, S., Guo, T., Parrent, A. G., Peters, T. M., & Khan, A. R. (2016). Generation and  
688 evaluation of an ultra-high-field atlas with applications in DBS planning. In M. A. Styner & E. D.  
689 Angelini (Eds.), *SPIE Medical Imaging* (Vol. 9784, p. 97840H). <http://doi.org/10.1117/12.2217126>
- 690 Xiao, Y., Fonov, V., Chakravarty, M. M., Beriault, S., Al Subaie, F., Sadikot, A., ... Collins, D. L. (2017). A  
691 dataset of multi-contrast population-averaged brain MRI atlases of a Parkinson's disease cohort.  
692 *Data in Brief*, *12*, 370–379. <http://doi.org/10.1016/j.dib.2017.04.013>
- 693 Yarkoni, T., Poldrack, R. A., Nichols, T. E., Van Essen, D. C., & Wager, T. D. (2011). Large-scale  
694 automated synthesis of human functional neuroimaging data. *Nature Methods*, *8*(8), 665–670.  
695 <http://doi.org/10.1038/nmeth.1635>
- 696
- 697



698

## Table Legends

699 **Table 1.** Summary of fiducial localization error across brain templates.

700

701 **Table 2.** Mean and inter-rater fiducial localization error pre- and post-QC for the included OASIS-1 subjects for all AFIDs.

702

703 **Table 3.** Voxel overlap (Jaccard and Kappa) of the pallidum, striatum, and thalamus after linear registration only and combined

704

705

706 **Table 4.** AFRE after linear registration alone and combined linear/nonlinear registration.

707

708 **Table 5.** AFIDs demonstrating evidence of template-to-template misregistration for BigBrainSym with MNI2009bSym and

709

BigBrainSym with MNI2009bAsym as well as correspondence differences between MNI2009bAsym and MNI2009bSym.

710

## Figure Legends

711 **Fig 1.** Metrics for evaluating spatial correspondence between brain images include voxel overlap (i.e. ROI-based) metrics as

712

713

714

715

716 **Fig 2.** Each anatomical fiducial in the full AFID32 protocol is demonstrated with crosshairs at the representative location in

717

718

719

720

721 **Fig 3.** Metrics used for validating AFID placements are shown here in schematic form. Mean, intra-rater, and inter-rater AFLE

722

723

724 **Fig 4.** K-means clustering of point clouds relative to the mean fiducial location for each of the 32 AFIDs (left). Principle

725

726

727

728

729

730 **Fig 5.** A comparison of voxel overlap and distance metrics for establishing spatial correspondence between brain regions as

731

732

733

734

735

736

737 **Fig 6.** Investigating relationships between voxel overlap of the striatum and AFRE for each AFID. Focal misregistrations are

738

739

740

741

742

743

744 **Fig 7.** Select views demonstrating registration errors between BigBrainSym and MNI2009bSym. The green dots represent the

745

746

747

748

749

optimal AFID coordinates in MNI2009bSym space superimposed in both templates to provide a basis for comparing registration differences. While many of the midline AFIDs are stable across both templates, the infracollicular sulcus, pineal gland, splenium, and culmen are misregistered in BigBrainSym (red arrows). The AFIDs draw attention to registration differences in the BigBrainSym space in the tectal plate, pineal gland, and superior vermis (blue arrows).

## 750 Supporting Information

751 Additional Supporting Information may be found online in the supporting information tab for this article.

752 S1 File. Phase 1 Notebook.

753 S2 File. Phase 2 Notebook.

754 S3 File. Phase 3 Notebook.

755 S4 File. Phase 4 Notebook.
